# Supplementary material for: A regulatory module controlling stress-induced cell cycle arrest in Arabidopsis
Source: PubMed Central journal article supplement (PMC6449083; doi:10.7554/elife.43944), 2019-04-04
Supplement: elife-43944-fig9-data2.pdf [file elife-43944-fig9-data2.pdf]

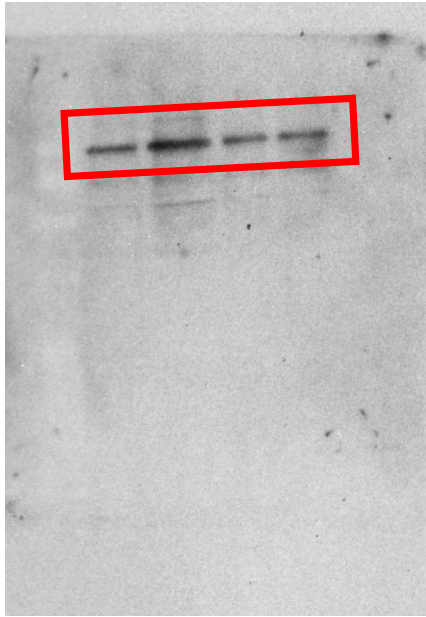

MYB3R3-GFP

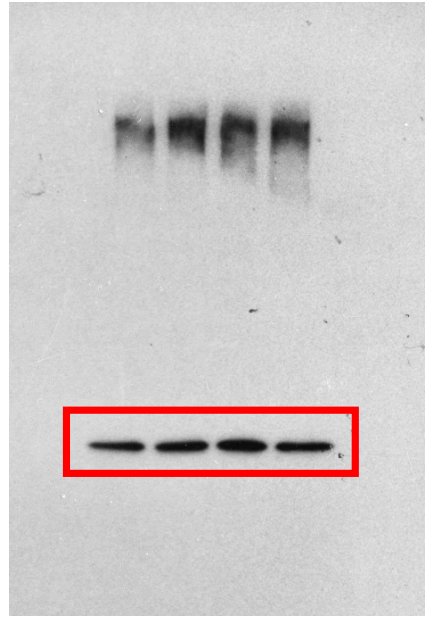

Histone H3

**Figure 9-source data 2.** Uncut blots.

The red sections mark blot results shown in Figure 9C.
